# Supplementary material
Source: Springer Nature journal article supplement (https://www.springermedizin.de/resource/supplementary/12889_2009_1960_MOESM1_ESM.pdf/9485692)
Supplement: MOESM1 [file 9485692]

**Preschools applying for gym lessons, fulfilling eligibility criteria**  
(preschool n=43)

**Not enrolled**  
(preschool n=6)  
refused to participate

**Enrolled with consent form**  
(preschool n= 37)

**Stratification** according to geographical location and SES  
**Randomization** into 2 study arms  
(preschool n= 37)

**Allocation to intervention (INT)**  
Received parent-focused intervention and state-sponsored gym lessons  
(preschool n=17, children N=370 )  
Mean cluster size: 23 (15-50)  
  
Did not receive allocated intervention (n= )  
Reasons:

Allocation

**Allocation to Control (CONT)**  
Received state-sponsored gym lessons  
(preschool n=20, children N=371 )  
Mean cluster size: 19 (9-46)  
  
Did not receive gym lessons (n= )  
Reasons:

**Loss to follow-up (n=1; N=6)**  
Discontinued measurements (n=1)  
Reasons: teacher disliked measurements

Follow-up

**Loss to follow-up (n=; N=)**  
Discontinued intervention (n= )  
Reasons:

**Analyzed (n=; N=)**

Analysis

**Analyzed (n=; N=)**
